1 **Duplications drive diversity in *Bordetella pertussis* on an underestimated scale**

2 Jonathan S. Abrahams<sup>1</sup>, Michael R. Weigand<sup>2</sup>, Natalie Ring<sup>1</sup>, Iain MacArthur<sup>1</sup>, Scott Peng<sup>2</sup>, Margaret  
3 M. Williams<sup>2</sup>, Barrett Bready<sup>3</sup>, Anthony P. Catalano<sup>3</sup>, Jennifer R. Davis<sup>3</sup>, Michael D. Kaiser<sup>3</sup>, John S.  
4 Oliver<sup>3</sup>, Jay M. Sage<sup>3</sup>, Stefan Bagby<sup>1</sup>, M. Lucia Tondella<sup>2</sup>, Andrew R. Gorryng<sup>4</sup>, Andrew Preston<sup>1</sup>

5 <sup>1</sup>Department of Biology and Biochemistry and Milner Centre for Evolution, University of Bath, Bath,  
6 U.K.

7 <sup>2</sup>Division of Bacterial Diseases, Centers for Disease Control and Prevention, Atlanta, Georgia, USA

8 <sup>3</sup>Nabsys 2.0, Providence, RI 02809

9 <sup>4</sup>Public Health England, Porton Down, Salisbury, UK

10

11 **Running Title:** *B. pertussis* copy number variation.

12 **Keywords:** *Bordetella pertussis*, genome structure, duplications, genetic diversity.

13

14 **Abstract.**

15 Bacterial genetic diversity is often described using solely base pair changes despite a wide variety of  
16 other mutation types likely being major contributors. Tandem duplications of genomic loci are  
17 thought to be widespread among bacteria but due to their often intractable size and instability,  
18 comprehensive studies of the range and genome dynamics of these mutations are rare. We define a  
19 methodology to investigate duplications in bacterial genomes based on read depth of genome  
20 sequence data as a proxy for copy number. We demonstrate the approach with *Bordetella pertussis*,  
21 whose insertion sequence element-rich genome provides extensive scope for duplications to occur.  
22 Analysis of genome sequence data for 2430 *B. pertussis* isolates identified 272 putative duplications,  
23 of which 94% were located at 11 hotspot loci. We demonstrate limited phylogenetic connection for  
24 the occurrence of duplications, suggesting unstable and sporadic characteristics. Genome instability  
25 was further described in-vitro using long read sequencing via the Nanopore platform. Clonally

26 derived laboratory cultures produced heterogenous populations containing multiple structural  
27 variants. Short read data was used to predict 272 duplications, whilst long reads generated on the  
28 Nanopore platform enabled the in-depth study of the genome dynamics of tandem duplications in *B.*  
29 *pertussis*. Our work reveals the unrecognised and dynamic genetic diversity of *B. pertussis* and, as  
30 the complexity of the *B. pertussis* genome is not unique, highlights the need for a holistic and  
31 fundamental understanding of bacterial genetics.

32

### 33 **Introduction.**

34 *Bordetella pertussis* is a Gram-negative bacterium which is the main causative agent of the human  
35 respiratory disease whooping cough. *B. pertussis* has speciated from a *B. bronchiseptica*-like  
36 ancestor to become a host restricted pathogen (Diavatopoulos et al. 2005; Parkhill et al. 2003). This  
37 process has occurred primarily via genome reduction: the *B. bronchiseptica* genome is around  
38 5.4Mbp whereas the *B. pertussis* genome is around 4.1Mbp, involving loss of over 1000 genes during  
39 speciation, and has been driven primarily by deletions arising from recombination between Insertion  
40 Sequence (IS) elements (Preston et al. 2004; Parkhill et al. 2003). Genomes of *B. pertussis* strains  
41 include over 240 copies of *IS481*, with far fewer copies of *IS1663* and *IS1002*. Gene erosion in *B.*  
42 *pertussis* appears to be on-going and sporadic IS-mediated deletions and disruptions provide subtle  
43 differences in gene content between strains (King et al. 2010; Heikkinen et al. 2007; Caro et al.  
44 2008), but there is little understanding of the effects.

45

46 Using the most popular metric of genetic diversity, single nucleotide polymorphisms (SNPs), *B.*  
47 *pertussis* is a species with extraordinarily low diversity leading to its description as a monomorph  
48 (Mooi 2010; Weigand et al. 2017). More detailed analyses of *B. pertussis* genome sequences have  
49 been limited by the inability to generate closed genome assemblies from short-read sequencing  
50 data, as the reads do not span *IS481* (1043 bp), and the assembly produces many contigs-  
51 consistently in excess of the number of *IS481* copies. Recent advances in long-read sequencing,  
52 notably by Pacific Biosciences (PacBio) and Oxford Nanopore Technologies (Nanopore), has enabled

53 routine generation of closed genome assemblies for *B. pertussis* (Weigand et al. 2018a, 2016; Ring et  
54 al. 2018; Weigand et al. 2017; Bowden et al. 2016). Subsequent comparative analyses have revealed  
55 that intragenomic recombination between IS481 causes genomic rearrangement and that a large  
56 number of different genome orders exist among circulating *B. pertussis* isolates (Weigand et al.  
57 2017). The effect of rearrangement on *B. pertussis* phenotype remains unknown but moving genes  
58 between leading and lagging strands and to different locations in the chromosome would be  
59 expected to alter their expression (Price et al. 2005; Rocha and Danchin 2003). Likewise,  
60 transcription from IS element promoters can affect neighbouring genes, and different copies of  
61 IS481 exhibit different transcriptional activities (Amman et al. 2018). Rearrangements that shuffle IS  
62 element-neighbouring gene combinations might, therefore, elicit changes in gene expression profiles  
63 both locally and genome-wide.

64

65 In addition to deletion and rearrangement, IS-mediated recombination can result in duplication.  
66 Twelve copy number variants (CNVs) in *B. pertussis* have been described and studies with sufficient  
67 genomic data have resolved them as tandem repeats (Caro et al. 2006; Dalet et al. 2004; Dienstbier  
68 et al. 2018; Heikkinen et al. 2007; Weigand et al. 2016, 2018a). Duplication of a region containing  
69 *cyaA* (encoding adenylate cyclase-haemolysin) increased haemolytic activity and it was noted that  
70 this duplication was highly unstable (Dalet et al. 2004). These serendipitous observations suggest  
71 that CNVs are a poorly characterised contributor to genetic diversity among *B. pertussis*. However,  
72 to date there has been no systematic analysis of CNVs in *B. pertussis* and indeed systematic analysis  
73 of structural variants at the species level is rare for bacteria, although it is relatively common in  
74 eukaryotic organisms. In this study we sought to catalogue CNVs in *B. pertussis*, utilising publicly  
75 available genomic data, which is overwhelmingly derived from short-read sequencing platforms.

76

77 Among genomic data from 2430 *B. pertussis* isolates we found 191 which contained evidence of  
78 CNVs and identified that 94% of CNVs occur at 11 'hotspot' loci. Some CNVs were very large,  
79 exceeding 300 kb in length. We reveal that some regions are present in multi-copy, and thus use the

80 term copy number variant (CNV) rather than duplication. We contextualise this information using  
81 phylogenetics and find that strains containing similar CNVs are often distantly related, suggesting  
82 that CNVs at hotspot loci arise independently. Also, we confirm that laboratory grown populations of  
83 cells contain a mixture of copy numbers suggesting that CNV formation is a dynamic process, at least  
84 at some loci. Our study revealed novel genetic variation among *B. pertussis* isolates and provides a  
85 blueprint for investigation of CNVs in other bacteria, particularly those with high numbers of  
86 repeats.

## 87 **Results**

88 The US Centers for Disease Control and Prevention (CDC) conducts routine and enhanced  
89 surveillance of pertussis, which includes whole genome sequencing of *B. pertussis* clinical isolates  
90 using the PacBio and Illumina platforms. Some of these data revealed increased read depth coverage  
91 localized to discrete genomic regions in some strains. Sequence data alone was incapable of  
92 resolving assembly of these regions but enzyme mapping of high-molecular weight DNA confirmed  
93 that the high read depth resulted from tandem CNVs. In total, genomes from 28 strains, including  
94 two used for the production of vaccines against pertussis, were identified which contained CNVs  
95 (Supplemental\_Table\_1) (Weigand et al. 2016). Some of these CNVs are large (>300kb), involving  
96 hundreds of genes. The accurate assembly of these genomes required manual resolution, using data  
97 from short read, long read and enzyme mapping sources. Using the manually resolved dataset as a  
98 benchmark, we sought to develop a prediction and screening tool to identify CNVs within the public  
99 repository of *B. pertussis* genome sequence data on the Sequence Read Archive (SRA) using a  
100 scalable and automated approach.

101

### 102 **Read depth as a proxy for copy number**

103 We mapped short-read data from each query strain to a reference genome and used read depth as a  
104 proxy for copy number of genomic regions (Figure 1). If a strain contained two copies of a locus  
105 present at single copy in the reference genome, twice as many reads should be detected that map to

106 that locus. Conversely, a gene deletion present in a query strain produces zero read depth at that  
107 locus in the reference. Since coverage depth fluctuates during whole genome sequencing due to a  
108 combination of biases and stochasticity (Ekblom et al. 2014; Loman et al. 2012), read depth coverage  
109 data was normalised and statistically analysed using the tool CNVnator (Abyzov et al. 2011).

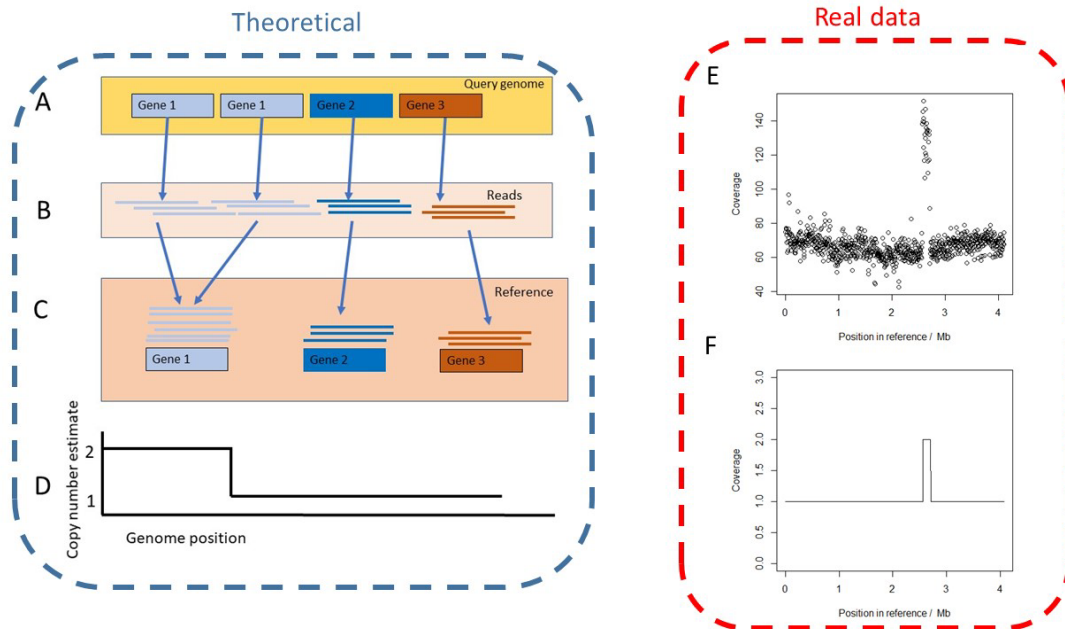

110

111 Figure 1. Schematic overview of prediction of CNVs from sequencing read depth. In the theoretical  
112 example (purple box, left), the query strain contains a perfect tandem duplication of gene 1 whilst  
113 gene 2 and 3 are at single copy (A). Short reads from the query strain are generated (B) and mapped  
114 to the reference genome, that contains all genes at single copy (C). Reads from both copies of gene 1  
115 in the query strain map to this locus in the reference sequence and thus twice as many reads map to  
116 this gene compared to genes 2 and 3. This data must be processed to avoid technical bias, the  
117 pipeline processes read coverage data into estimates of copy number (D). Using an example with  
118 real data (red box, right) the strain SAMN08200079 was analysed. Read coverage was graphed to  
119 reveal a duplication at ~1.4Mb (E, analogous to theoretical graph C) which was statistically analysed  
120 using our pipeline (F, analogous to theoretical graph D).

121

122 The performance of our approach was first tested using Illumina HiSeq reads simulated from the  
123 B1917 reference genome, which does not contain CNVs. As expected, no CNVs (false positives) were  
124 predicted and all genes were correctly estimated at single copy. The approach was further evaluated  
125 by mapping Illumina data from those strains with manually resolved CNVs described above, each of  
126 which contained one CNV.

127 When data is mapped to a reference the true gene order of the sample is masked- an inherent  
128 feature of read mapping. Therefore, strains with duplications in rearranged loci may appear as  
129 discontinuous stretches of duplicated DNA in the reference. When establishing the accuracy of the  
130 pipeline we only considered resolved CNVs that were contiguous on the B1917 reference genome as  
131 other CNVs are impossible to accurately resolve. Two samples were therefore excluded because they  
132 contained rearrangements relative to B1917. Whilst the 25 remaining CNVs occurred at just three  
133 distinct loci, their beginning and ending coordinates, as well as overall length, varied between  
134 strains. Thus, three measures of accuracy were tested: the correct prediction of the 25 CNVs, the  
135 quantity of false positives and the predicted beginning and ending locations of each CNV (breakpoint  
136 accuracy). Only one (J321) of the 25 data sets failed our quality control (see Methods) for high read  
137 depth noise and was excluded; leaving 24 high quality strains.

138 Of the 24 resolved, high quality and suitable CNVs, 23 were correctly predicted (defined as  $\geq 80\%$   
139 reciprocal overlap) (Supplemental\_Table\_1). Three false positives were detected in three different  
140 strains. Two of these were due to one gene within the CNV locus being predicted as single copy,  
141 causing the true, single CNV to be predicted as two, separated by the falsely predicted single copy  
142 gene. In the third false positive, a second locus was predicted as a duplication and despite further  
143 analysis, no evidence was found of a second duplication in this isolate.

144 The breakpoint accuracy of estimates was calculated with false positives excluded  
145 (Supplemental\_Figure\_1). The median distance between the true values and the read depth-based  
146 estimates was 1 gene. There were five estimated start/end points which were considerably ( $\geq 5$

147 genes) less accurate than the rest of the dataset, mainly arising from the two strains in which the  
148 CNV was predicted as two separate loci.

149 Thus the pipeline correctly predicted, and with excellent breakpoint accuracy, the CNVs for 20 of the  
150 27 resolved genomes (74%), with 3 further CNVs predicted (11%) but as two adjacent but separate  
151 loci.

152

### 153 **CNVs as a source of genetic diversity.**

154 The pipeline was applied to predict CNVs in 2709 *B. pertussis* isolates for which short-read sequence  
155 data was available in the Sequence Read Archive (SRA) or locally provided (n=94). Of the 2709 total  
156 *B. pertussis* samples, 94 exhibited < 30x average coverage and 185 had high read coverage noise.

157 Therefore, the final test dataset included 2430 *B. pertussis* isolates (Supplemental\_Table\_2). B1917  
158 was used as the reference genome. Of the 2430 studied isolates, 1711 had all genes predicted at  
159 single copy, leaving 719 strains with at least one deletion or CNV. Of these, 191 isolates contained  
160 272 CNVs- some strains containing multiple CNVs. Computed copy number estimates  
161 (Supplemental\_Table\_2) were visualized with an interactive heatmap for inspection where it became  
162 apparent that particular loci were present as CNVs in multiple strains, which we termed ‘hotspot’  
163 loci (Figure 2). Consistent with our observations in the resolved dataset and previous reports (Ring et  
164 al. 2018; Weigand et al. 2016, 2018a), CNVs at hotspot loci varied in length between isolates, with  
165 differing start and end points but including a core set of genes.

166

### 167 **Most CNVs occur at hotspots**

168 The relationship between all CNVs was quantified as the proportion of gene content overlap  
169 between all pairwise comparisons. Network graphs were constructed between CNVs (‘nodes’) that  
170 were connected by at least 75% content overlap (‘edges’). The 272 identified CNVs formed 24  
171 network graphs, representing 24 distinct genomic loci (Supplemental\_Table\_3). Only 11 network

172 graphs, corresponding to the hotspot loci, included three or more isolates and contained 254/272  
173 (93%) of the predicted CNVs (Supplemental\_Figure\_3). Network density is the percentage of  
174 theoretically possible edges observed between nodes in a network. The mean density of all CNV  
175 networks was 71%, indicating that the CNVs in each network were highly interconnected, Table 1.

176 <https://plot.ly/~kows1337676/433.embed>

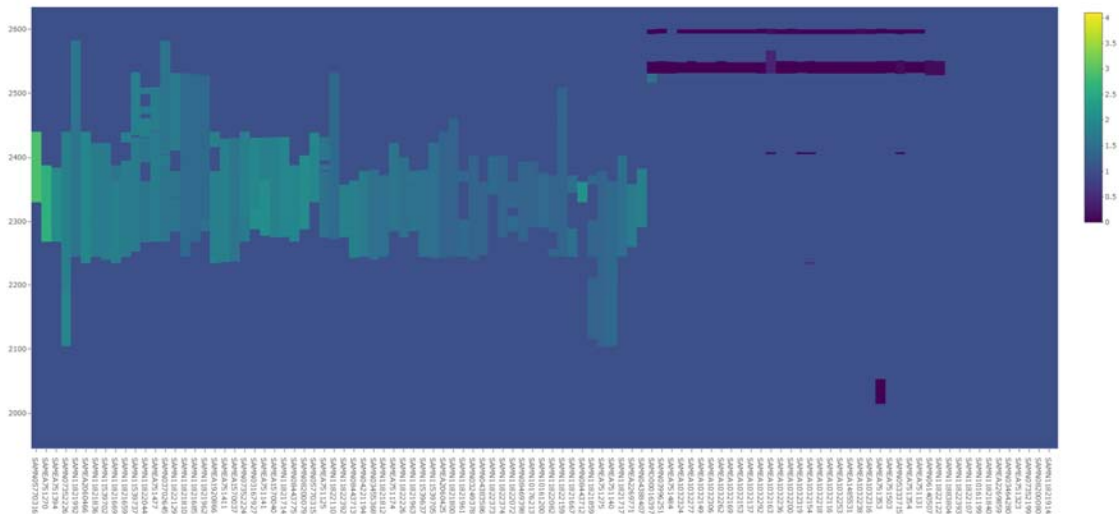

177  
178 Figure 2. A section of the heatmap comprising the majority of CNVs in Network 1, including a  
179 triplication of this locus. Isolates are in columns, while rows indicated the index of each gene in the  
180 reference sequence. The colour scale (Z axis) indicates the copy number of each gene. A legend of  
181 the colour scale is on the far right.

182  
183 Given the density of CNV networks, hotspot loci were investigated further to identify which genes  
184 formed the 'core' and how central these genes were to their respective network. To define the  
185 network core, we determined the genes contained in at least 55% of the CNVs in a network. To  
186 extend beyond just defining the central genes of the network we quantified the difference between  
187 the central core and the full-length CNVs within each network (analogous to the core and accessory  
188 genome in the study of pangenomes). The mean overlap between the CNVs in a network and the  
189 network core was calculated to give the 'core representation' statistic. These metrics revealed that  
190 the core of most networks, with the exception of network 3, comprised at least 50% of the mean



191 length of all CNVs in each network (Supplemental\_Table\_4). Thus, the 11 hotspot loci described here  
 192 were composed of CNVs that varied around a central core rather than overlapping CNVs arranged in  
 193 series.

| Network name | Frequency (CNVs) | Mean length (genes) | Median start (B1917 gene name) | Median end (B1917 gene name) | Mean copy number | Core (>=55% proportion) | Network density (%) |
|--------------|------------------|---------------------|--------------------------------|------------------------------|------------------|-------------------------|---------------------|
| 1            | 102              | 106                 | RS12140                        | RS12755                      | 1.6              | 50                      | 55                  |
| 2            | 57               | 82                  | RS15100                        | RS15490                      | 1.7              | 61                      | 63                  |
| 3            | 21               | 80                  | RS07175                        | RS07660                      | 1.68             | 35                      | 60                  |
| 4            | 18               | 20                  | RS00010                        | RS00130                      | 1.35             | 96                      | 100                 |
| 5            | 13               | 67                  | RS19230                        | RS19625                      | 1.93             | 51                      | 50                  |
| 6            | 11               | 75                  | RS05505                        | RS05935                      | 1.6              | 77                      | 73                  |
| 7            | 8                | 49                  | RS04185                        | RS04430                      | 1.88             | 78                      | 71                  |
| 8            | 8                | 74                  | RS09665                        | RS10290                      | 1.82             | 58                      | 43                  |
| 9            | 7                | 13                  | RS19965                        | RS10580                      | 2.49             | 98                      | 100                 |
| 10           | 6                | 23                  | RS19465                        | RS19565                      | 1.32             | 94                      | 100                 |
| 11           | 3                | 45                  | RS01035                        | RS01300                      | 1.63             | 87                      | 67                  |

194 Table 1. 'Hotspot' CNV network statistics

195

196 It could be seen in the heatmap that not only did the CNVs cluster at specific hotspots but that some  
 197 samples had multiple CNVs at the same hotspot. This may have been due to a complex mixture of  
 198 structural variations affecting the same locus, such as nested duplications (Weigand et al. 2018a) or  
 199 the locus being disrupted by inversions. It is also possible that, as detected in two cases of the  
 200 benchmarking experiment, a CNV was predicted as two separate regions of higher copy number.

201

202 A number of network cores contained genes with varied, predicted functions. For example, Network  
203 1 contained genes for flagellar motility (Hoffman et al. 2019); Network 2 contained the *nuo* operon  
204 which is linked to respiration (Nakamura et al. 2006; Archer and Elliott 1995) and Network 3  
205 contained the *fim3* gene involved in the pathogenesis of *B. pertussis* and present in some acellular  
206 vaccine formulations (Scheller et al. 2015). In addition, the networks contextualised the 25 resolved  
207 genomes previously studied, the majority of which were in networks 1, 2, and 3.

208 **CNV plasticity during *in vitro* growth.**

209 CNVs identified above were often predicted with non-integer copy numbers in addition to copy  
210 number discrepancies between predicted and resolved copy number in the manually resolved  
211 dataset (Supplemental\_Figure\_2). To confirm our predictions from short-read sequencing data and  
212 investigate the basis for non-integer copy numbers, we exploited the tractable size of one relatively  
213 small CNV. The genome of UK54 (SAMEA1920853) was predicted to have a 16 kb CNV at a copy  
214 number of 4.1; short enough to observe the entire CNV locus in a single sequence read on the  
215 Nanopore platform, assuming that each copy occurred in tandem as observed in both our data and  
216 previous reports (Weigand et al. 2016, 2018c). The duplication was part of Network 9 which was  
217 comprised of 7 other duplications, one of which was also predicted at a copy number >2 (3.3, Strain  
218 SAMN11822098).

219

220 The copy number of this locus in UK54 was first validated using qPCR. The relative copy number of a  
221 gene within the CNV compared to a single-copy gene encoded outside the CNV locus was 4.38 +/-  
222 0.4 which matched the read depth-based prediction.

223 Whole genome sequencing on the Nanopore platform yielded a mean read length of only 9.1kb but  
224 produced over 3000 reads with a length exceeding 50kb. Sequence reads that contained both of the  
225 regions flanking the CNV locus and the CNV locus itself were identified (n = 9) and contained the CNV

226 at different copy numbers (Figure 3). This demonstrated that a laboratory culture of UK54 comprised  
227 a mixture of copy numbers at this locus and explains the non-integer copy numbers predicted by  
228 CNVnator. Genomic DNA for sequencing is derived from laboratory populations of bacteria and if  
229 these harbour CNVs at different copy numbers, subsequent read-depth based predictions will  
230 represent the average read depth of all of the bacteria sequenced.

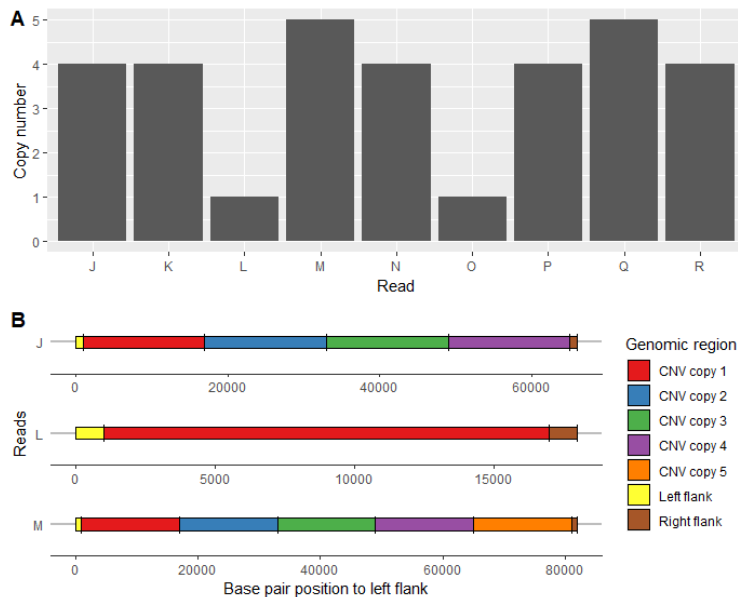

231

232 Figure 3. Ultra-long read sequencing of UK54 revealed the presence of different copy number CNV  
233 loci within a single culture. Individual sequence reads that spanned the CNV loci were identified  
234 using Blastn, labelled J to R. (Panel A). The data shows each read (x-axis) containing 1,4 or 5 copies of  
235 the locus (y-axis) and therefore, as each read appears to be integrated into the chromosome, there  
236 were cells present in the population with 1, 4 or 5 copies of the locus. The arrangement of the  
237 relevant section of three reads (J, L and M) is illustrated in panel B.

238

239 It was not known if the original culture of UK54 involved isolation of a single colony or collection of  
240 multiple clones from the diagnostic plate growth and thus whether the observed variation in copy  
241 number resulted from a mixed culture or emerged during laboratory growth prior to sequencing. To  
242 investigate this, we picked eight single colonies of UK54 and passaged them by growth on agar and  
243 then during broth growth. Each of these clonal populations were theoretically derived from a single

244 bacterium. The copy number at the CNV locus in each of the resulting clones was estimated using  
245 qPCR (Figure 4) and ranged from 2.2 (clone 6) to 51.2 (clone 8). We sequenced UK54 clone 4 using  
246 the Nanopore platform and observed sequence reads with copy numbers 1, 2, 4, and 5 (Figure 5).  
247 These data strongly suggested that CNV copy number was plastic, with variants arising during *in vitro*  
248 growth from a single bacterium to the culture from which the gDNA was extracted.

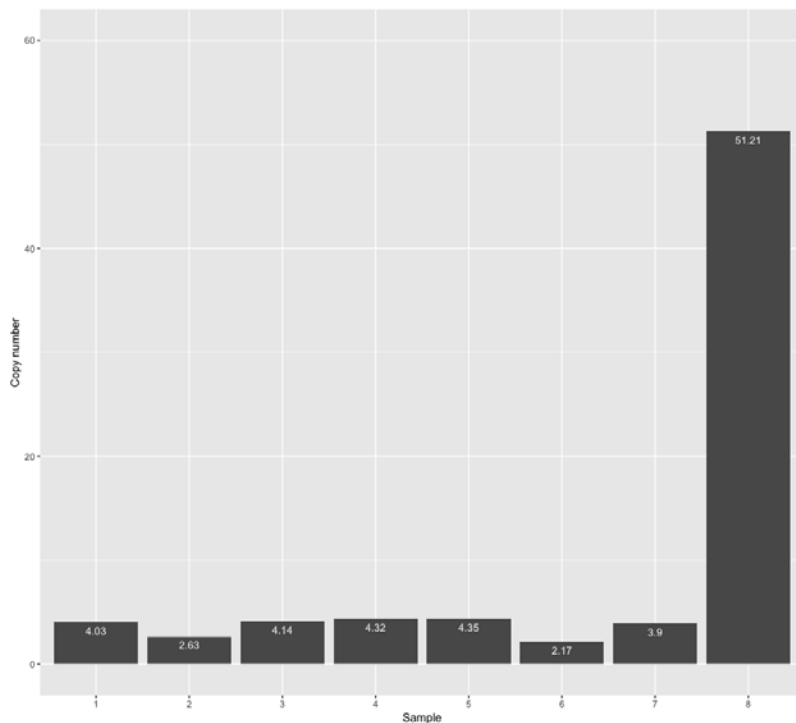

249  
250 Figure 4: Quantification of CNV copy number of 8 clones of UK54 by qPCR demonstrated a range of  
251 copy numbers from 2.17 to 51.21

252  
253 Nanopore sequencing was also performed with UK54 clone 8, which exhibited a copy number  
254 estimate of 51 by qPCR (corresponding to a predicted CNV length of 816kb) (Figure 5). No reads  
255 spanning the entire CNV locus (i.e. the CNV locus with flanking DNA on each side) were produced,  
256 presumably due to its extreme length. However, reads containing up to 7 copies of the locus,  
257 without flanking regions, were identified. Relaxing the Blastn alignment parameters from a 90%  
258 minimum query length of the CNV locus to 50% identified a maximum of 9 copies of the locus  
259 present on a single read with incompletely sequenced copies at each end. Consistent with the copy

260 number prediction from qPCR, the read depth at this locus for UK54 clone 8 from the Nanopore data  
261 was approximately 60x higher than the genome average, strongly supporting the very high copy  
262 number estimate for this locus in this clone.

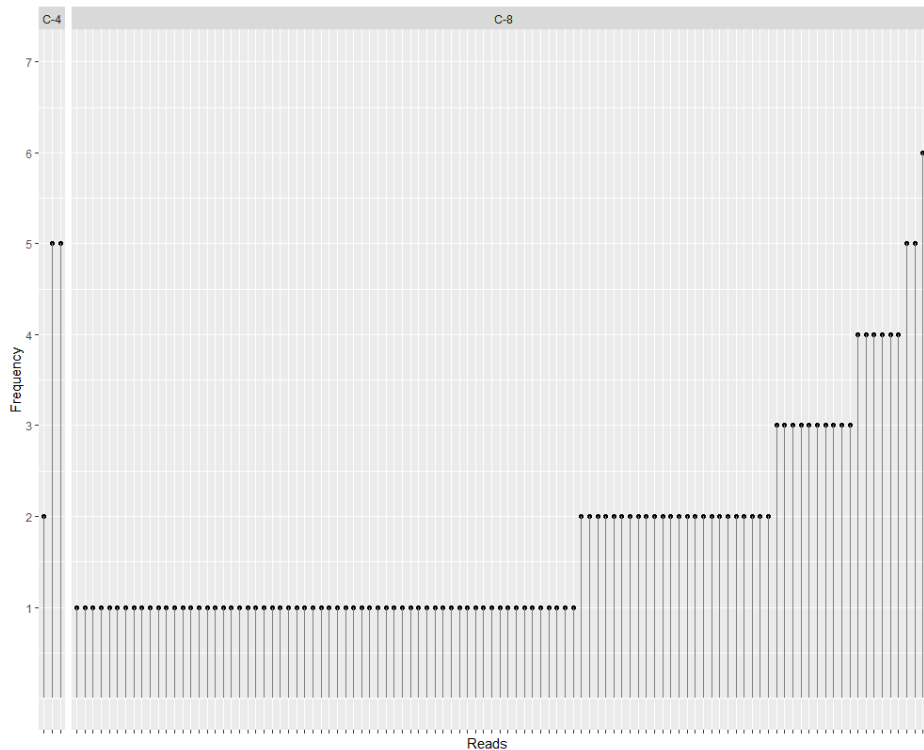

263  
264 Figure 5. Nanopore sequencing of UK54 clone 4 and 8 (C-4 and C-8) revealed the presence of  
265 different copy number loci within a single culture. Individual sequence reads that spanned the CNV  
266 loci were identified using Blastn successfully in clone 4 whilst clone 8 had no reads spanning the full  
267 locus. The data show each read (X axis) contained between one and seven copies of the locus (Y  
268 axis).

269

270 To investigate potential phenotypic variation resulting from amplification of genes by CNV  
271 formation, we measured mRNA levels for one gene within the CNV locus in UK54 clones with  
272 different average copy numbers. Levels were normalized to the single copy *recA* that is often used as  
273 a stably-expressed housekeeping gene in RT-qPCR experiments. We selected clones 2, 4, and 8, with  
274 screened copy numbers of 2.63, 4.32, and 51.21, respectively. As we demonstrated that each culture

275 comprises a heterogenous mixture of cells with varied CNV copy number, we re-estimated the locus  
276 copy number for each clone using the same laboratory culture from which RNA was extracted. Upon  
277 re-growing these clones for RNA extraction, the average copy number in each changed (non-  
278 significantly) to 4.1, 6.5, and 53.1 in clones 2, 4, and 8, respectively. The mRNA level for the CNV  
279 gene corresponded with the copy number (Figure 6); normalising the transcript level in clone 2 to a  
280 value of 1, it was 16.8 fold higher ( $P < 0.0001$ ) in clone 8. It was also higher, but not significantly, in  
281 clone 4 ( $P = 0.76$ ). However, broadly, using the data as a whole, there is an association between DNA  
282 copy number and transcript abundance. This strongly suggests that the gene dosages produced by  
283 CNVs affected relative gene expression levels.

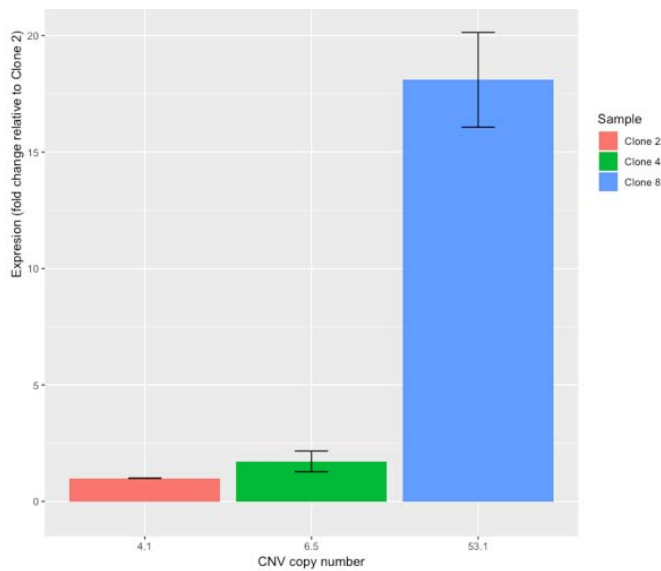

284

285 Figure 6: Copy numbers of clones 2, 4 and 8 were quantified using qPCR and expression of a gene  
286 within the CNVs was quantified by RT-qPCR. Expression is shown as a relative fold change to Clone 2.  
287 Error bars represent standard deviation of expression. The results show that copy number  
288 corresponds to RNA expression.

289

### 290 **Structural plasticity during *in vitro* growth.**

291 Analysing the Nanopore data from clonally derived populations strongly suggested that the CNV  
292 locus in UK54 was plastic. To investigate if similar effects were occurring at other genomic loci we

293 identified sequence reads that contained regions that are proximal on the sequence read but not in  
294 the consensus genome sequence- putative structural variants arising from genome rearrangement.  
295 In UK54 clone 4, 59 reads out of >600k total reads were identified as having a gene order that was  
296 different to the consensus sequence. Structural variants occur primarily by recombination between  
297 repeats (although recombination is possible between regions with no homology (Reams and Neidle  
298 2004; Nilsson et al. 2006)) and therefore, only the 22 reads containing repeat sequences at the  
299 junction were further analysed.

300 Structural variations could be delineated between rearrangements or deletions/CNVs by analysis of  
301 the orientation of the DNA before and after the junction. If the DNA segments are in the opposite  
302 orientation it can be assumed the mutation was an inversion whereas if they are the same  
303 orientation it is likely the mutation was a deletion or duplication as has been seen previously  
304 (Weigand et al. 2017, 2018b).

305 Our results demonstrated that, like CNV copy number, putative structural variants can also be  
306 detected during *in vitro* growth, distributed around the genome (Figure 7). Interestingly, in addition  
307 to structural variation via recombination between IS, we observed both rearrangement and  
308 deletion/CNV from recombination between a 3kb locus found duplicated in a number of recent  
309 clinical isolates and these duplicated loci were identified as a potential hotspot for recombination  
310 (Figure 7) (Weigand et al. 2017). Tandem CNVs between these sequences were not observed in our  
311 study of 1000's of isolates but Weigand et al found that rearrangements arising from recombination  
312 between these loci were common (Weigand et al. 2017).

313

314 Often, clonal bacterial cultures are sequenced to study mutations that have occurred further back in  
315 evolutionary history and have become fixed. However, these experiments also inadvertently capture  
316 a 'snapshot' of evolutionary time. We can therefore observe the creation of a variety of errors in the  
317 DNA of populations of cells using this 'snapshot' – mutations which are otherwise invisible when an  
318 average (consensus) sequence is made for the population. Whilst cells with lethal or highly

319 deleterious mutations are not expected to persist in a population, a number of reads appeared to  
320 strikingly indicate deletions or duplications of over 1Mb of DNA. Whilst these structural variants are  
321 putative, they indicate, in combination with our other results, the ongoing genome plasticity of BP.

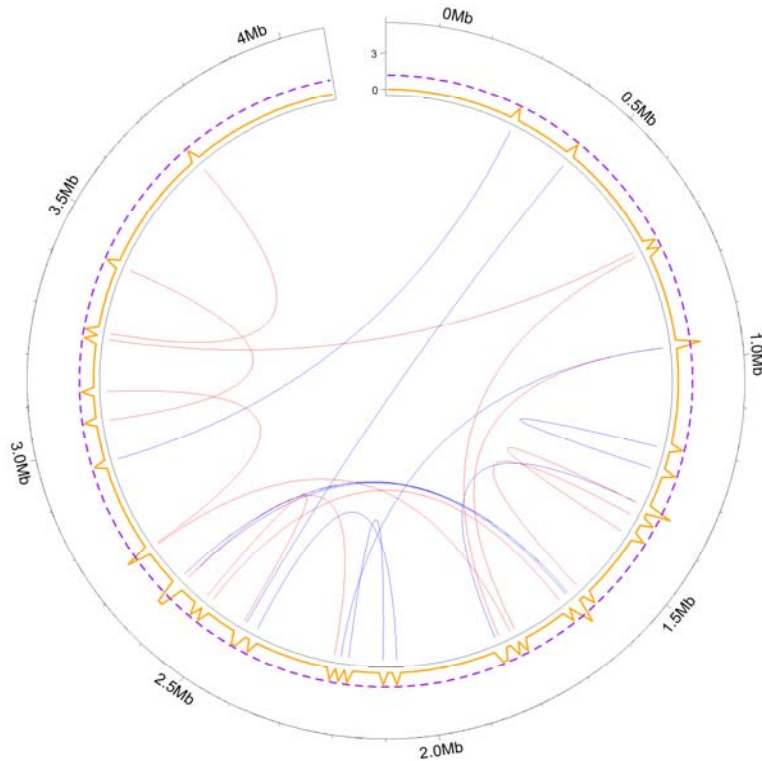

322  
323 Figure 7. Circos plot (inner circle) of putative structural variants present in individual reads (n=22)  
324 that were absent in the consensus sequence. Red lines are CNVs or deletions and blue lines are  
325 rearrangements. The frequency of structural mutations occurring in 10kb windows was plotted  
326 (orange line) with the dashed purple line representing three standard deviations above the mean to  
327 identify potential 'hotspot' regions. The analysis shows a uniform distribution of structural variants  
328 around the genome with only the regions at 1.6Mb and 2.6Mb representing a potential hotspot.

### 329 **CNVs were highly associated with repetitive sequences**

330 While we verified one predicted CNV, verification was not feasible for the remaining 272. However,  
331 to increase confidence in these predictions we investigated their association with repetitive  
332 elements, compared to all genes. All previously published and resolved CNVs were adjacent to  
333 repetitive sequences, suggesting this was a clear marker for true CNVs. We used only closed genome



334 sequences, as the location and frequency of repetitive sequences varies between strains, and  
335 excluded CNVs already described in the manually resolved genomes or which were disrupted by  
336 genome rearrangements, leaving 16 CNVs in 13 isolates.  
337 The 16 predicted CNV boundaries were significantly ( $p < 6^{-08}$ ) closer to repeat genes (median distance  
338 of +/- 1 gene) than non-CNV genes (median distance of +/- 5 genes) (Figure 8 and  
339 Supplemental\_Table\_5). This, in conjunction with our stringent quality control steps and the  
340 previously accurate predictions, supports the accuracy of the prediction of 272 CNVs.

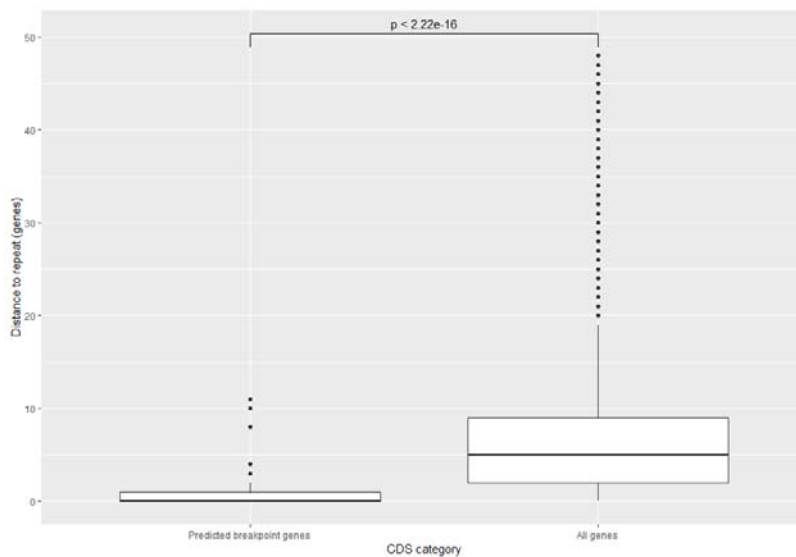

341  
342 Figure 8. The distance (measured in genes) between CNVs and repeat genes was identified in closed  
343 genomes. The ends of CNV loci were found to be significantly closer (median: 0 genes) to repeats  
344 than the average gene (median: 5 genes).

345

### 346 **CNVs occur sporadically throughout the phylogenetic tree**

347 We had demonstrated that CNVs could change copy number over the microevolutionary timescales  
348 of days during growth in the laboratory. In addition, it was demonstrated that while CNVs did  
349 overlap at hotspot loci they often had unique gene contents-strongly indicating each arose from an  
350 independent mutation. Therefore, we theorised that there was no strong phylogenetic relationship  
351 between CNVs within a network. To test this, we sought to estimate for each network if at any point

352 in the phylogenetic tree an ancestral strain, represented by an internal node of the tree, was likely to  
353 have had the corresponding CNV (Supplement\_Table\_6). This was performed by using presence or  
354 absence of CNVs within a network as a discrete trait.

355 Ancestral state reconstruction (ASR) resulted in 16 nodes near the tips of the tree ( $\leq 7$  SNPs and  $\leq 8$   
356 tree splits) having a high likelihood ( $>0.8$  empirical Bayesian posterior probability) of being in a  
357 duplicated state. Due to the large number of isolates studied in combination with the extremely low  
358 diversity of *B. pertussis*, however, branch lengths were often 0- potentially skewing the results.  
359 Further investigation of this effect showed that 7 of the 16 nodes of interest had just one tip with  
360 branch length 0 directly stemming from the node. The extremely close relationships between these  
361 tips and nodes leads to an overwhelming statistical signal to the ASR algorithm leading to false  
362 positive results. These 7 nodes were ignored. Our results therefore indicated very limited heritability  
363 of CNVs, but yielded 8 putative examples of the mutation being maintained over small evolutionary  
364 time scales.

## 365 Discussion

366 *B. pertussis* is described as a monomorphic bacterium (Mooi 2010) that has evolved as a human-  
367 specific pathogen through gene loss via homologous recombination between direct repeats.  
368 However, homologous recombination can also cause multi-gene CNVs. Although 12 multi-gene CNVs  
369 had been described previously, no systematic analysis of CNVs in *B. pertussis* had been carried out.  
370 In this study, short-read genome sequence data generated on the Illumina platform for 2430 strains  
371 were analysed using read depth as a proxy for copy number. Our results revealed 11 clusters  
372 consisting of 272 CNVs, some of which comprised hundreds of genes, revealing a novel aspect of  
373 genetic variation among *B. pertussis*. This contributes to a growing literature that demonstrates that  
374 quantifying *B. pertussis* diversity requires a comprehensive view of mutation types, not just the  
375 quantification of DNA base changes (Weigand et al. 2017; Bowden et al. 2016; Weigand et al.  
376 2018a).

377

378 The large number of copies of IS481 throughout the *B. pertussis* genome suggests that a very large  
379 number of different genome rearrangements (Weigand et al. 2017) and CNVs are possible. Despite  
380 the vast diversity of possible CNVs, however, 94% of observed CNVs appeared at just 11 hotspot loci,  
381 suggesting strong purifying selection acts on CNVs in *B. pertussis*. This discrepancy between the  
382 potential and observed distribution was further explored by sequencing strains after limited *in vitro*  
383 growth - greatly reducing (but not eliminating) the effects of selection. We also identified putative  
384 *de novo* generation of structural variants, albeit infrequent, and demonstrated that the copy number  
385 of the studied CNV (in UK54) was plastic over short laboratory timescales. High genome plasticity  
386 was further supported by the limited heritability identified using ancestral state reconstruction  
387 among the global *B. pertussis* population. Our results shed light on the continual homologous  
388 recombination in *B. pertussis* and support a range of studies that established the genome dynamics  
389 of homologous recombination in bacteria (Anderson and Roth 1981; Edlund et al. 1979; Chen et al.  
390 2008).

391 CNVs can be very costly mutations, carrying as much as a 0.15% fitness cost per 1kb, primarily due to  
392 increased gene dosage leading to additional transcription and translation rather than replication of a  
393 larger genome (Adler et al. 2014). According to this estimate, the larger CNVs observed in this study  
394 may carry fitness costs over 30%. Therefore, unless higher levels of transcribed (non-coding RNA) or  
395 translated (proteins) gene products provided a strong selective advantage to overcome such a cost,  
396 the CNVs is likely to be selected against. One of the most frequent hotspots observed in this study  
397 included genes for flagellar motility. Motility has been frequently implicated in the virulence of  
398 bacterial pathogens, but *B. pertussis* has long been regarded as non-motile. However, recent  
399 research has shown that motility can be occasionally observed *in vitro* (Hoffman et al. 2019) and  
400 flagellar biosynthesis genes are expressed during murine challenge compared to *in vitro* growth,  
401 potentially implicating motility or biofilm formation in infection (van Beek et al. 2018). Duplication at  
402 this locus may, therefore, affect the virulence, colonisation, or carriage of *B. pertussis* in the human  
403 population, but the influence may be modulated due to the plasticity of CNVs.

404 Long-read Nanopore sequencing of two clones of UK54 led to the remarkable observation of a CNV  
405 with average copy number of 51. It is a well-documented phenomenon that multiple copies of a  
406 locus in tandem greatly increases the instability of the locus. In experimental systems, copy numbers  
407 of up to 100 have been generated (Edlund et al. 1979) and in clinically derived isolates the copy  
408 numbers of antimicrobial resistance genes can change rapidly, increasing up to 70 copies in response  
409 to antibiotics (Nicoloff et al. 2019). Whilst the function of the genes in the UK54 CNVs are unclear it  
410 is possible that they provide a fitness benefit to the strain under certain conditions.

411 Our investigation demonstrates several widely applicable approaches to the study of CNVs. Our  
412 application of a CNVnator-based pipeline utilises short-read sequencing data that is available for  
413 thousands of bacteria. A limitation of this approach is that reads were mapped to B1917 and  
414 therefore CNVs were predicted as if the gene order was the same in B1917, despite frequent  
415 rearrangements in the population. This may lead to the read depth signal being ‘split’ on the B1917  
416 reference when they are, in truth, contiguous on another genome, leading to multiple CNV  
417 predictions. To overcome the limitations of short read sequencing we therefore used long-read DNA  
418 sequencing for spanning repeat regions to enable resolution of CNVs and genome arrangement,  
419 although correct assemblies required additional data. However, genotypes could be described using  
420 single Nanopore reads to identify copy number heterogeneity within in-vitro cultures.

421 Network graphs were used to analyse the complex relationships between CNVs in *B. pertussis*  
422 quantitatively. This arrangement of CNVs appears in other bacterial species (Weiner et al. 2012) in  
423 addition to plants (Faris et al. 2000) and animals (Perry et al. 2006) and therefore, networks are a  
424 flexible and generic framework to analyse such phenomena. An advantage of using networks to  
425 describe hotspot loci was the ability to semantically categorise CNVs to unite the findings of many  
426 studies and contextualise them with new data. Previously, using limited data, we had demonstrated  
427 a ‘hotspot-like’ effect by resolving four CNVs with subtle gene content variations at the same loci  
428 (Weigand et al. 2016, 2018a), corresponding here to Network 1, at which other CNVs had also been  
429 reported (Dalet et al. 2004; Weigand et al. 2018b, 2016; Heikkinen et al. 2007). Our results  
430 contextualise this research, providing another 90 CNVs at this location and we combined core CNV

431 and mean overlap statistics to show that the majority of the 11 networks in our analysis consisted of  
432 CNVs which varied around a core set of genes, just as in Network 1. The varied start and stop  
433 positions of overlapping CNVs among strains offers further evidence that amplification of the core  
434 genes may be under selection yielding multiple independent mutations.

435 The unusually high number of insertion sequences within the *B. pertussis* genome, and their  
436 relatively even distribution, likely facilitates the genome-wide distribution of structural variants.  
437 Indeed, genomes of related species *B. paraptussis* and *B. holmesii* each harbour fewer IS elements  
438 and thus exhibit fewer rearrangements (Weigand et al. 2019) and very rare CNVs (M.R. Weigand,  
439 unpublished). However whilst unusual, *B. pertussis* is not unique, as its abundance of IS elements  
440 ranks in the top 30 in a study of 1000's of bacterial isolates (Robinson et al. 2012). It is likely that  
441 such dynamics are playing out in other species proportional to their IS elements load (Weiner et al.  
442 2012; Yang et al. 2005).

443 In conclusion, we have rigorously and successfully investigated the repertoire of CNVs in *B. pertussis*,  
444 revealing a novel layer of diversity that should be considered when quantifying variation within the  
445 species. These results revise existing knowledge of circulating *B. pertussis* and highlight challenges to  
446 molecular surveillance. Previously, low-resolution genome typing, specifically pulsed-field gene  
447 electrophoresis (PFGE), has been the primary tool for pertussis molecular epidemiology due the high  
448 diversity of profiles observed among clinical isolates compared to other methods (Bowden et al.  
449 2014). While much of this diversity is attributable to rearrangement (Weigand et al. 2017), the  
450 present study also highlights a role for CNVs and that their transient and homoplastic nature may  
451 mask the ancestral (epidemiological) relationships between strains or over-estimate genetic  
452 diversity. (Weigand et al. 2017) Taken together, our contemporary genomic study of circulating *B.*  
453 *pertussis* should signal the end to this pathogen's designation as a monomorphic species.

## 454 **Methods**

### 455 **Sequence read mapping**

456 Short read data originating from the Illumina platform were retrieved from the National Centre for  
457 Biotechnology Information's (NCBI) Sequence Read Archive (SRA). One run was chosen at random  
458 for each BioSample, totalling 2709 runs including 94 locally provided runs. Reads were mapped to  
459 the *B. pertussis* B1917 genome, which is broadly representative of the modern circulating strains  
460 (Bart et al. 2014) (RefSeq ID: NZ\_CP009751.1), using BWA (Li 2014) implemented in Snippy  
461 (available: <https://github.com/tseemann/snippy>).

#### 462 **CNV prediction**

463 CNVnator (Abyzov et al. 2011) was used to predict CNVs from read depth data generated from the  
464 mapping process. Statistical tests for significance within CNVnator discriminate high and low  
465 confidence calls. To further increase specificity, we implemented a very low P-value cutoff  
466 ( $p < 0.0001$ ). Abyzov *et al* empirically tested CNVnator to determine that ratios of the average read  
467 depth to the standard deviation of 4-5 produce the best balance between sensitivity and specificity  
468 (Abyzov et al. 2011). In accordance, samples exhibiting ratios  $< 3$  were discarded as CNV calls were  
469 unreliable on such variable data (Abyzov et al. 2011). Window length was optimised for each  
470 genome, testing window sizes 500 -1000bp at intervals of 100bp to evaluate which gave a ratio  
471 closest to 4.5 as to minimize the effect of stochastic and/or artefactual fluctuations in read depth  
472 across the genome. Copy number estimates were rounded to the nearest 0.1. Code is available:  
473 <https://github.com/Jonathan-Abrahams/Duplications>

#### 474 **Control data**

475 As a negative control, short reads were simulated from the B1917 reference genome using ART to  
476 simulate the error profile of Illumina HiSeq paired-end 150 bp data (-ss HS25 -p -l 150 -f 20 -m 200 -s  
477 10) (Huang et al. 2012). Simulated reads were mapped back to the reference genome using Snippy  
478 and CNVnator was used to call any spurious CNVs, as described above (Abyzov et al. 2011). As a  
479 positive control dataset, closed genome sequences from 25 isolates with manually resolved CNVs  
480 were used. This data was generated using a combination of PacBio and Illumina sequencing and

481 optical mapping on the Argus or Nabsys HD platforms, as done previously (Weigand et al. 2016,  
482 2017, 2018c).

### 483 **Heatmap**

484 The read depth-based predictions were hierarchically clustered based on the similarities of CNV  
485 profiles (including deletions) of samples using the R package Hclust. This therefore meant that  
486 strains with similar complements of CNVs and deletions were clustered together on the heatmap  
487 which was plotted using the R package Plotly (Plotly Technologies Inc. 2015).

### 488 **Networks**

489 Overlapping gene content among CNVs was evaluated by constructing undirected network graphs  
490 which quantified the relationships (edges) between each CNV (nodes). An edge was constructed  
491 between nodes if both CNVs had a 75% overlap (non-reciprocal). Network analysis was undertaken  
492 in R using the Igraph package (Csardi and Nepusz 2006) and networks layout was generated by the  
493 Fruchterman algorithm (Fruchterman and Reingold 1991).

### 494 **qPCR**

495 Bacteria were grown on charcoal agar for 3 days at 37 C before inoculation into Stainer-Scholte (SS)  
496 broth (Stainer and Scholte 1970) and grown overnight at 37 C with shaking at 180 rpm; these  
497 cultures were used to inoculate fresh media at an  $OD_{600} = 0.2$ . Bacterial cells were harvested (1ml for  
498 DNA and 10ml for RNA extraction) at  $OD_{600} = 1.1 \pm 0.1$  by centrifugation (4000xg for 10 min) and  
499 resuspended in 700  $\mu$ l of Tri-reagent (Invitrogen, ThermoFisher, Loughborough, UK), vortexed  
500 vigorously, and frozen at -80°C. DNA was purified using QIAamp kit (Qiagen, Manchester, UK) in  
501 accordance with the manufacturer's instructions. The concentration of DNA was determined using  
502 Qubit broad range DNA quantification kit (Fisher Scientific).

503

504 qPCR was run on a StepOne Real-time PCR System (Applied Biosystems, ThermoFisher) using  
505 TaqMan™ Universal PCR Master Mix (Applied Biosystems), in a total reaction volume of 20  $\mu$ l with

506 100pmol of DNA and with primer and probe concentrations as described in Supplement\_Tables\_7.  
507 Triplicate reactions were run for each sample. Reaction conditions were: 10 min at 95°C followed by  
508 40 cycles of 15 sec at 95°C and 1 min at 60°C. Copy number was quantified by using the  $2^{-\Delta\Delta CT}$   
509 method. Three biological repeats were used for determination of copy number in UK54.

510

511 To isolate RNA, nucleic acids were precipitated with ethanol, residual DNA was removed by  
512 incubation with 4U of Turbo DNase (Ambion, ThermoFisher) for 1 hour at 37 °C, and RNA was  
513 purified using the RNeasy kit (Qiagen, Manchester, UK) in accordance with the manufacturer's  
514 instructions. The concentration of RNA was determined using Qubit broad range RNA quantification  
515 kit (Fisher Scientific). RNA integrity was determined by agarose gel electrophoresis. Finally, RNA was  
516 confirmed as being DNA free by PCR using 50 ng of RNA as template in PCR with *recAF* and *recAR*  
517 primers. First strand cDNA was synthesised using ProtoScript II (NEB) with 1µg of total RNA as  
518 template and 6 µM random primers and incubated for 5 min at 25°C, 1 h at 42°C. The reaction was  
519 stopped by incubating at 65°C for 20 min. cDNA was diluted 1/30 in H<sub>2</sub>O for use in qPCR.

520 RT-qPCR was run on an a StepOne Real-time PCR System using SyberGreen Turbo Master mix  
521 (Applied Biosystems), in a total reaction volume of 25 µl with primers at 300 nM. Triplicate reactions  
522 were run for each sample. Reactions conditions were: 95°C for 10 min and 40 cycles of 95°C for  
523 15sec and 1 min at 60°C. The housekeeping gene *recA* was used as a stably expressed control gene  
524 (Supplement\_table\_7). The  $\Delta CT$  and  $\Delta\Delta CT$  were calculated by determining the difference between  
525 the reference condition and experimental condition. Relative expression was represented as fold  
526 change (fold change =  $2^{-\Delta\Delta CT}$ ). Significance was determined with one-way ANOVA.

527

## 528 **Electronic mapping**

529 Genomic DNA isolation from *Bordetella pertussis* strains D236, D800, H624, J085, J196, and J321 was  
530 performed at the CDC according to a Nabsys solution-based protocol modified from the bacterial



531 DNA protocol for AXG 20 columns and Nucleobond Buffer Set III (Macherey-Nagel, Bethlehem, PA).  
532 Purified DNA was sent to Nabsys for nicking, tagging, coating and data collection on an HD-Mapping  
533 instrument. Nicking enzyme Nb.BssSI (NEB) was used for strain D236 and the nicking enzyme  
534 combination Nt.BspQI/Nb.BbvCI (NEB) was used for strains D800, H624, J085, J196, and J321.  
535 Resulting *de novo* assembled HD maps, raw data, and data remapped to PacBio *de novo* assemblies  
536 were provided by Nabsys for further analysis and sequence assembly comparisons at the CDC using  
537 NPS analysis (v1.2.2424) and CompareAssemblyToReference (v1.10.0.1).

538

### 539 **Nanopore sequencing**

540 *B. pertussis* strain UK54 bacteria were stored at -80°C in PBS/20% glycerol at the University of Bath.  
541 Bacteria were grown for 72 hours at 37°C on charcoal agar (Oxoid) plates. Harvested cells were  
542 resuspended in 10 ml SS broth to an OD<sub>600</sub> of 0.1 and grown overnight. At approximately OD<sub>600</sub> 1.0,  
543 cultures were diluted in 50 ml SS broth to an OD<sub>600</sub> of 0.1 and grown to OD<sub>600</sub> 1.0. Bacteria were  
544 centrifuged at 13 000xg for 5 minutes and processed for gDNA extraction using the protocol  
545 available from [dx.doi.org/10.17504/protocols.io.mrxc57n](https://dx.doi.org/10.17504/protocols.io.mrxc57n). The rapid adaptor (SQK-RAD004)  
546 Nanopore library preparation steps were included, adapted for sequencing of very long gDNA  
547 molecules.

548 DNA was sequenced for 48 hours on GridION or MinION sequencers using R9.4 flow cells. Base-  
549 calling was performed with Guppy (V2.1.3 or V3.2.1) using the “fast” Flip-flop model. Reads spanning  
550 the CNV locus were identified using Blastn alignment with a minimum query length coverage of 90%  
551 for the 16kb CNV locus and 10% for the single copy flanking regions (~1kb).

### 552 **Identification of structural variants from Nanopore sequence reads**

553 Nanopore reads from UK54 were assembled as previously described (Ring et al. 2018), producing a  
554 closed genome of length 4.1Mb, without resolution of any predicted CNVs. To investigate individual  
555 reads for putative CNVs or inversions Blastn was used. In order to ease the interpretation of Blastn

556 alignments, the assembly was depleted of homologous regions (e.g., IS481 insertions, rRNA operons)  
557 using a 1 kb sliding window, with 200bp step size, and removing all 1kb windows which shared at  
558 least 50% homology. The resulting modified assembly was 3.4 Mb (82.9% of full length).  
559 During Nanopore sequencing it is possible for two reads to pass consecutively through a single pore  
560 and analysed as a single ‘chimeric’ read-potentially causing false positive CNVs in that read. Because  
561 DNA fragments are ligated to adapters during sequencing, such chimeras include an adapter  
562 sequence in the middle. Porechop was used to trim adapter sequences from reads (available:  
563 <https://github.com/rrwick/Porechop>). Adapters detected in the middle of reads were trimmed using  
564 a lower ‘middle threshold’ identity (75%) rather than default (85%) to ensure a low level of chimeric  
565 reads. Each read was aligned to the modified assembly using Blastn and analysed for aligned regions  
566 proximal on the read but not on the assembly. Reads of interest were mapped back to the full  
567 consensus sequence to analyse the relationships between the DNA ‘junctions’ (the point at which  
568 the seemingly disparate regions joined together) and repetitive sequences. Reads which contained a  
569 join between two different loci were discarded if the join did not occur in a repeat region (IS, gene  
570 duplicate or rRNA). Results were plotted in R using the Circlize package (Gu et al. 2014).

#### 571 **Association of CNVs with repeat regions.**

572 The association of CNV loci with repetitive sequences was tested. Closed genome sequences for  
573 isolates containing putative CNVs (excluding previously verified CNVs) were downloaded and the  
574 association of CNV boundaries with repeat sequences was determined using R and blast.

#### 575 **Phylogenetics**

576 To investigate the phylogenetic relationship between strains containing CNVs, a core genome SNP  
577 alignment was created using Snippy (available: <https://github.com/tseemann/snippy>). A  
578 phylogenetic tree was constructed using Fasttree (Price et al. 2010) and ItoI (Letunic and Bork 2007)  
579 was used to display the tree. Ancestral state reconstruction was undertaken in R using the Ace  
580 function in the Ape package (Paradis et al. 2004).

581

582 **Data Access.**

583 All data generated during this study are included in this published article and its supplementary  
584 information files. Illumina data for the 28 resolved genome strains is available on the SRA  
585 (<https://www.ncbi.nlm.nih.gov/sra>) with accession numbers SRR9123572, SRR5829828,  
586 SRR9006092-3, SRR9123574, SRR9151823, SRR9006149, SRR5829737, SRR5829824, SRR5829749,  
587 SRR5829769/SRR5829803, SRR9006067, SRR9118395, SRR5829789/SRR5829798, SRR9118319,  
588 SRR9118314, SRR9118293, SRR9118269, SRR9118452, SRR5070923/SRR5514663,  
589 SRR5071090/SRR5514664, SRR9131605, SRR9131607, SRR9131663-5.SRR9151824.

590 Nanopore data is available from NCBI with accession number PRJNA604974.

591 Code needed to reproduce the analysis in this study is contained on Github and is linked to  
592 throughout the text.

593

594 **Acknowledgements.**

595 We thank Josh Quick and Nick Loman, Institute of Microbiology and Infection, School of Biosciences,  
596 University of Birmingham for technical assistance with long read sequencing on the Nanopore  
597 platform. The data analysis performed here would not have been possible without access to the  
598 bioinformatics resource, CLIMB (developed by the MRC, grant number MR/L015080/1). This work  
599 was made possible through support from CDC's Advanced Molecular Detection (AMD)  
600 program. The findings and conclusions in this report are those of the authors and do not  
601 necessarily represent the official position of the Centers for Disease Control and Prevention.

602

603 **Disclosure Declaration.**

604 N.R. is part-funded by Oxford Nanopore Technologies to conduct PhD research. No other conflicts of  
605 interest exist. This project was reviewed in accordance with CDC human research protection  
606 procedures and was determined to be non-research, public health surveillance.

607

## 608 **References**

609 Abyzov A, Urban AE, Snyder M, Gerstein M. 2011. CNVnator: An approach to discover, genotype, and  
610 characterize typical and atypical CNVs from family and population genome sequencing.

611 *Genome Res* **21**: 974–984.

612 Adler M, Anjum M, Berg OG, Andersson DI, Sandegren L. 2014. High fitness costs and instability of  
613 gene duplications reduce rates of evolution of new genes by duplication-divergence

614 mechanisms. *Mol Biol Evol* **31**: 1526–1535.

615 Amman F, Halluin AD, Antoine R, Huot L, Keidel K, Slupek S, Bouquet P, Coutte L. 2018. Primary

616 transcriptome analysis reveals importance of IS elements for the shaping of the transcriptional

617 landscape of *Bordetella pertussis*. **6286**.

618 Anderson P, Roth J. 1981. Spontaneous tandem genetic duplications in *Salmonella typhimurium*

619 arise by unequal recombination between rRNA (*rrn*) cistrons. *Proc Natl Acad Sci* **78**: 3113–3117.

620 <http://www.ncbi.nlm.nih.gov/pubmed/6789329> (Accessed August 2, 2019).

621 Archer CD, Elliott T. 1995. Transcriptional control of the *nuo* operon which encodes the energy-

622 conserving NADH dehydrogenase of *Salmonella typhimurium*. *J Bacteriol* **177**: 2335–42.

623 <http://www.ncbi.nlm.nih.gov/pubmed/7730262> (Accessed July 19, 2019).

624 Bart CJ, Zeddeman MJ, Van Der Heide AGJ, Heuvelman H, Van Gent K, Mooi MR. 2014. Complete

625 genome sequences of *Bordetella pertussis* isolates B1917 and B1920, representing two

626 predominant global lineages. *Genome Announc* **2**: 1301–1315. <http://dx.doi.org/10.1093/>

627 (Accessed July 17, 2019).

628 Bowden KE, Weigand MR, Peng Y, Cassidy PK, Sammons S, Knipe K, Rowe LA, Loparev V, Sheth M,

- 629 Weening K, et al. 2016. Genome Structural Diversity among 31 *Bordetella pertussis* Isolates  
630 from Two Recent U.S. Whooping Cough Statewide Epidemics. *mSphere* **1**.  
631 <http://www.ncbi.nlm.nih.gov/pubmed/27303739> (Accessed December 5, 2018).
- 632 Bowden KE, Williams MM, Cassiday PK, Milton A, Pawloski L, Harrison M, Martin SW, Meyer S, Qin X,  
633 DeBolt C, et al. 2014. Molecular epidemiology of the pertussis epidemic in Washington State in  
634 2012. *J Clin Microbiol* **52**: 3549–57. <http://www.ncbi.nlm.nih.gov/pubmed/25031439> (Accessed  
635 February 20, 2019).
- 636 Caro V, Bouchez V, Guiso N. 2008. Is the Sequenced *Bordetella pertussis* strain Tohama I  
637 representative of the species? *J Clin Microbiol* **46**: 2125–8.  
638 <http://www.ncbi.nlm.nih.gov/pubmed/18385436> (Accessed August 2, 2019).
- 639 Caro V, Hot D, Guigon G, Hubans C, Arrivé M, Soubigou G, Renauld-Mongénie G, Antoine R, Locht C,  
640 Lemoine Y, et al. 2006. Temporal analysis of French *Bordetella pertussis* isolates by  
641 comparative whole-genome hybridization. *Microbes Infect* **8**: 2228–2235.  
642 <https://www.sciencedirect.com/science/article/pii/S128645790600178X> (Accessed December  
643 5, 2018).
- 644 Chen Z, Yang H, Pavletich NP. 2008. Mechanism of homologous recombination from the RecA–  
645 ssDNA/dsDNA structures. *Nature* **453**: 489–494.  
646 <http://www.ncbi.nlm.nih.gov/pubmed/18497818> (Accessed September 26, 2019).
- 647 Csardi G, Nepusz T. 2006. The igraph software package for complex network research. *InterJournal*  
648 **Complex Systems**: 1695. <http://igraph.org> (Accessed September 16, 2019).
- 649 Dalet K, Weber C, Guillemot L, Njamkepo E, Guiso N. 2004. Characterization of adenylate cyclase-  
650 hemolysin gene duplication in a *Bordetella pertussis* isolate. *Infect Immun* **72**: 4874–4877.
- 651 Diavatopoulos DA, Cummings CA, Schouls LM, Brinig MM, Relman DA, Mooi FR. 2005. *Bordetella*  
652 *pertussis*, the Causative Agent of Whooping Cough, Evolved from a Distinct, Human-Associated  
653 Lineage of *B. bronchiseptica*. *PLoS Pathog* **1**: e45.

- 654 <http://www.ncbi.nlm.nih.gov/pubmed/16389302> (Accessed September 19, 2017).
- 655 Dienstbier A, Pouchnik D, Wildung M, Amman F, Hofacker IL, Parkhill J, Holubova J, Sebo P, Vecerek  
656 B. 2018. Comparative genomics of Czech vaccine strains of *Bordetella pertussis*. *Pathog Dis* **76**.  
657 <https://academic.oup.com/femspd/article/doi/10.1093/femspd/fty071/5089975> (Accessed  
658 December 12, 2018).
- 659 Edlund T, Grundström T, Normark S. 1979. Isolation and characterization of DNA repetitions carrying  
660 the chromosomal  $\beta$ -lactamase gene of *Escherichia coli* K-12. *MGG Mol Gen Genet* **173**: 115–  
661 125. <http://link.springer.com/10.1007/BF00330301> (Accessed July 19, 2019).
- 662 Ekblom R, Smeds L, Ellegren H. 2014. Patterns of sequencing coverage bias revealed by ultra-deep  
663 sequencing of vertebrate mitochondria. *BMC Genomics* **15**: 467.  
664 <http://www.ncbi.nlm.nih.gov/pubmed/24923674> (Accessed October 15, 2019).
- 665 Faris JD, Haen KM, Gill BS. 2000. Saturation mapping of a gene-rich recombination hot spot region in  
666 wheat. *Genetics* **154**: 823–35. <http://www.ncbi.nlm.nih.gov/pubmed/10655233> (Accessed  
667 August 14, 2019).
- 668 Fruchterman TMJ, Reingold EM. 1991. Graph drawing by force-directed placement. *Softw Pract Exp*  
669 **21**: 1129–1164. <http://doi.wiley.com/10.1002/spe.4380211102> (Accessed September 16,  
670 2019).
- 671 Gu Z, Gu L, Eils R, Schlesner M, Brors B. 2014. circlize implements and enhances circular visualization  
672 in R. *Bioinformatics* **30**: 2811–2812. [https://academic.oup.com/bioinformatics/article-  
673 lookup/doi/10.1093/bioinformatics/btu393](https://academic.oup.com/bioinformatics/article-lookup/doi/10.1093/bioinformatics/btu393) (Accessed August 13, 2019).
- 674 Heikkinen E, Kallonen T, Saarinen L, Sara R, King AJ, Mooi FR, Soini JT, Mertsola J, He Q. 2007.  
675 Comparative Genomics of *Bordetella pertussis* Reveals Progressive Gene Loss in Finnish Strains  
676 ed. Y.-S. Bahn. *PLoS One* **2**: e904. <http://dx.plos.org/10.1371/journal.pone.0000904> (Accessed  
677 December 5, 2018).
- 678 Hoffman CL, Gonyar LA, Zacca F, Sisti F, Fernandez J, Wong T, Damron FH, Hewlett EL. 2019.

- 679 Bordetella pertussis Can Be Motile and Express Flagellum-Like Structures. *MBio* **10**: e00787-19.  
680 <http://www.ncbi.nlm.nih.gov/pubmed/31088927> (Accessed July 17, 2019).
- 681 Huang W, Li L, Myers JR, Marth GT. 2012. ART: A next-generation sequencing read simulator.  
682 *Bioinformatics* **28**: 593–594.
- 683 King AJ, van Gorkom T, van der Heide HGJ, Advani A, van der Lee S. 2010. Changes in the genomic  
684 content of circulating Bordetella pertussis strains isolated from the Netherlands, Sweden,  
685 Japan and Australia: Adaptive evolution or drift? *BMC Genomics* **11**.
- 686 Letunic I, Bork P. 2007. Interactive Tree Of Life (iTOL): An online tool for phylogenetic tree display  
687 and annotation. *Bioinformatics* **23**: 127–128.
- 688 Li H. 2014. Toward better understanding of artifacts in variant calling from high-coverage samples.  
689 *Bioinformatics* **30**: 2843–2851.
- 690 Loman NJ, Misra R V, Dallman TJ, Constantinidou C, Gharbia SE, Wain J, Pallen MJ. 2012.  
691 Performance comparison of benchtop high-throughput sequencing platforms. *Nat Biotechnol*  
692 **30**: 434–439. <http://www.ncbi.nlm.nih.gov/pubmed/22522955> (Accessed October 15, 2019).
- 693 Mooi FR. 2010. Bordetella pertussis and vaccination: The persistence of a genetically monomorphic  
694 pathogen. *Infect Genet Evol* **10**: 36–49.  
695 <https://www.sciencedirect.com/science/article/pii/S1567134809002226?via%3DiHub>  
696 (Accessed October 9, 2019).
- 697 Nakamura MM, Liew S-Y, Cummings CA, Brinig MM, Dieterich C, Relman DA. 2006. Growth phase-  
698 and nutrient limitation-associated transcript abundance regulation in Bordetella pertussis.  
699 *Infect Immun* **74**: 5537–48. <http://www.ncbi.nlm.nih.gov/pubmed/16988229> (Accessed July 19,  
700 2019).
- 701 Nicoloff H, Hjort K, Levin BR, Andersson DI. 2019. The high prevalence of antibiotic heteroresistance  
702 in pathogenic bacteria is mainly caused by gene amplification. *Nat Microbiol* **4**: 504–514.  
703 <http://www.ncbi.nlm.nih.gov/pubmed/30742072> (Accessed July 19, 2019).

- 704 Nilsson AI, Zorzet A, Kanth A, Dahlstrom S, Berg OG, Andersson DI. 2006. Reducing the fitness cost of  
705 antibiotic resistance by amplification of initiator tRNA genes. *Proc Natl Acad Sci* **103**: 6976–  
706 6981. <http://www.ncbi.nlm.nih.gov/pubmed/16636273> (Accessed August 13, 2019).
- 707 Paradis E, Claude J, Strimmer K. 2004. APE: Analyses of Phylogenetics and Evolution in R language.  
708 *Bioinformatics* **20**: 289–290. [https://academic.oup.com/bioinformatics/article-](https://academic.oup.com/bioinformatics/article-lookup/doi/10.1093/bioinformatics/btg412)  
709 [lookup/doi/10.1093/bioinformatics/btg412](https://academic.oup.com/bioinformatics/article-lookup/doi/10.1093/bioinformatics/btg412) (Accessed July 17, 2019).
- 710 Parkhill J, Sebahia M, Preston A, Murphy LD, Thomson N, Harris DE, Holden MTG, Churcher CM,  
711 Bentley SD, Mungall KL, et al. 2003. Comparative analysis of the genome sequences of  
712 *Bordetella pertussis*, *Bordetella parapertussis* and *Bordetella bronchiseptica*. *Nat Genet* **35**: 32–  
713 40.
- 714 Perry GH, Tchinda J, McGrath SD, Zhang J, Picker SR, Cáceres AM, lafrate AJ, Tyler-Smith C, Scherer  
715 SW, Eichler EE, et al. 2006. Hotspots for copy number variation in chimpanzees and humans.  
716 *Proc Natl Acad Sci U S A* **103**: 8006–11. <http://www.ncbi.nlm.nih.gov/pubmed/16702545>  
717 (Accessed July 17, 2019).
- 718 Plotly Technologies Inc. 2015. Collaborative data science. *Plotly Technol Inc* . <https://plot.ly>.
- 719 Preston A, Parkhill J, Maskell DJ. 2004. The *Bordetellae*: Lessons from genomics. *Nat Rev Microbiol* **2**:  
720 379–390.
- 721 Price MN, Alm EJ, Arkin AP. 2005. Interruptions in gene expression drive highly expressed operons to  
722 the leading strand of DNA replication. *Nucleic Acids Res* **33**: 3224–34.  
723 <http://www.ncbi.nlm.nih.gov/pubmed/15942025> (Accessed August 1, 2019).
- 724 Price MN, Dehal PS, Arkin AP, Rojas M, Brodie E. 2010. FastTree 2 – Approximately Maximum-  
725 Likelihood Trees for Large Alignments ed. A.F.Y. Poon. *PLoS One* **5**: e9490.  
726 <http://dx.plos.org/10.1371/journal.pone.0009490> (Accessed August 8, 2017).
- 727 Reams AB, Neidle EL. 2004. Gene Amplification Involves Site-specific Short Homology-independent  
728 Illegitimate Recombination in *Acinetobacter* sp. Strain ADP1. *J Mol Biol* **338**: 643–656.



- 729 <https://www.sciencedirect.com/science/article/pii/S0022283604003262?via%3DiHub>  
730 (Accessed August 13, 2019).
- 731 Ring N, Abrahams J, Preston A, Bagby S. 2018. Resolving the complex B . pertussis genome with  
732 barcoded nanopore sequencing. 4.
- 733 Robinson DG, Lee M-C, Marx CJ. 2012. OASIS: an automated program for global investigation of  
734 bacterial and archaeal insertion sequences. *Nucleic Acids Res* **40**: e174–e174.  
735 <https://academic.oup.com/nar/article/40/22/e174/1139563> (Accessed February 21, 2019).
- 736 Rocha EPC, Danchin A. 2003. Gene essentiality determines chromosome organisation in bacteria.  
737 *Nucleic Acids Res* **31**: 6570–6577. <http://www.ncbi.nlm.nih.gov/pubmed/14602916> (Accessed  
738 August 1, 2019).
- 739 Scheller E V, Melvin JA, Sheets AJ, Cotter PA. 2015. Cooperative roles for fimbria and filamentous  
740 hemagglutinin in *Bordetella* adherence and immune modulation. *MBio* **6**: e00500-15.  
741 <http://www.ncbi.nlm.nih.gov/pubmed/26015497> (Accessed July 19, 2019).
- 742 Stainer DW, Scholte MJ. 1970. A Simple Chemically Defined Medium for the Production of Phase I  
743 *Bordetella pertussis*. *J Gen Microbiol* **63**: 211–220.  
744 <http://www.ncbi.nlm.nih.gov/pubmed/4324651> (Accessed August 22, 2019).
- 745 van Beek LF, de Gouw D, Eleveld MJ, Bootsma HJ, de Jonge MI, Mooi FR, Zomer A, Diavatopoulos DA.  
746 2018. Adaptation of *Bordetella pertussis* to the Respiratory Tract. *J Infect Dis* **217**: 1987–1996.  
747 <https://academic.oup.com/jid/article/217/12/1987/4924714> (Accessed February 9, 2019).
- 748 Weigand MR, Pawloski LC, Peng Y, Ju H, Burroughs M, Cassidy PK, Davis JK, DuVall M, Johnson T,  
749 Juieng P, et al. 2018a. Screening and genomic characterization of filamentous hemagglutinin-  
750 deficient *Bordetella pertussis*. *Infect Immun* IA1.00869-17.  
751 <http://www.ncbi.nlm.nih.gov/pubmed/29358336><http://iai.asm.org/lookup/doi/10.1128/IAI.00869-17>.  
752 AI.00869-17.
- 753 Weigand MR, Pawloski LC, Peng Y, Ju H, Burroughs M, Cassidy PK, Davis JK, DuVall M, Johnson T,

- 754 Juieng P, et al. 2018b. Screening and genomic characterization of filamentous hemagglutinin-  
755 deficient *Bordetella pertussis*. *Infect Immun* **86**.
- 756 Weigand MR, Pawloski LC, Peng Y, Ju H, Burroughs M, Cassiday PK, Davis JK, DuVall M, Johnson T,  
757 Juieng P, et al. 2018c. Screening and Genomic Characterization of Filamentous Hemagglutinin-  
758 Deficient *Bordetella pertussis* ed. V.B. Young. *Infect Immun* **86**.  
759 <http://www.ncbi.nlm.nih.gov/pubmed/29358336> (Accessed December 12, 2018).
- 760 Weigand MR, Peng Y, Batra D, Burroughs M, Davis JK, Knipe K, Loparev VN, Johnson T, Juieng P,  
761 Rowe LA, et al. 2019. Conserved Patterns of Symmetric Inversion in the Genome Evolution of  
762 *Bordetella* Respiratory Pathogens ed. J.A. Gilbert. *mSystems* **4**.  
763 <http://msystems.asm.org/lookup/doi/10.1128/mSystems.00702-19> (Accessed December 13,  
764 2019).
- 765 Weigand MR, Peng Y, Loparev V, Batra D, Bowden KE, Burroughs M, Cassiday PK, Davis JK, Johnson T,  
766 Juieng P, et al. 2017. The History of *Bordetella pertussis* Genome Evolution Includes Structural  
767 Rearrangement. *J Bacteriol* JB.00806-16. <http://jb.asm.org/lookup/doi/10.1128/JB.00806-16>.
- 768 Weigand MR, Peng Y, Loparev V, Johnson T, Juieng P, Gairola S, Kumar R, Shaligram U, Gowrishankar  
769 R, Moura H, et al. 2016. Complete Genome Sequences of Four *Bordetella pertussis* Vaccine  
770 Reference Strains from Serum Institute of India. *Genome Announc* **4**: e01404-16.  
771 <http://www.ncbi.nlm.nih.gov/pubmed/28007855> (Accessed December 5, 2018).
- 772 Weiner B, Gomez J, Victor TC, Warren RM, Sloutsky A, Plikaytis BB, Posey JE, van Helden PD, Gey van  
773 Pittius NC, Koehrsen M, et al. 2012. Independent large scale duplications in multiple M.  
774 tuberculosis lineages overlapping the same genomic region. *PLoS One* **7**: e26038.  
775 <http://www.ncbi.nlm.nih.gov/pubmed/22347359> (Accessed February 20, 2019).
- 776 Yang F, Yang J, Zhang X, Chen L, Jiang Y, Yan Y, Tang X, Wang J, Xiong Z, Dong J, et al. 2005. Genome  
777 dynamics and diversity of *Shigella* species, the etiologic agents of bacillary dysentery. *Nucleic  
778 Acids Res* **33**: 6445–58. <http://www.ncbi.nlm.nih.gov/pubmed/16275786> (Accessed July 19,

779 2019).

780
